# Supplementary material
Source: Springer Nature journal article supplement (https://www.springermedizin.de/resource/supplementary/12911_2012_543_MOESM2_ESM.pdf/9525798)
Supplement: MOESM2 [file 9525798]

**Additional file 3: Healthcare professional and health information professional questionnaire**

| Items                                                                                                                                                    | EHR implementation factor                                 |
|----------------------------------------------------------------------------------------------------------------------------------------------------------|-----------------------------------------------------------|
| 1) The technical limitations of EHRs (for example, slow computer system speed) are a barrier to EHR implementation.                                      | Design and technical concerns                             |
| 2) Healthcare professionals' perception of the advantages and the usefulness of EHRs is a facilitator to EHR implementation.                             | Perceived usefulness                                      |
| 3) Healthcare professionals' perception that EHRs are easy to use is a facilitator to EHR implementation.                                                | Perceived ease of use                                     |
| 4) Healthcare professionals' concern that EHR use may compromise patient privacy is a barrier to EHR implementation.                                     | Privacy and security concerns (patient privacy)           |
| 5) Healthcare professional's perception that EHRs contribute to improving productivity and efficiency is a facilitator to EHR implementation.            | Productivity                                              |
| 6) Healthcare professionals' perception that EHRs positively influence healthcare services is a facilitator to EHR implementation.                       | Outcome expectancy (influence on healthcare services)     |
| 7) Healthcare professionals' motivation to use EHRs is a facilitator to EHR implementation.                                                              | Motivation to use EHR                                     |
| 8) Healthcare professionals' concern that EHRs may compromise their interaction with the patient is a barrier to EHR implementation.                     | Patient and health professional interaction               |
| 9) The heavy workload of many healthcare professionals is a barrier to EHR implementation.                                                               | Lack of time and workload (professional tasks)            |
| 10) Healthcare professionals' concern about EHR use being time-consuming is a barrier to EHR implementation.                                             | Lack of time and workload (EHR use)                       |
| 11) Lack of human resources (for example, extra staff) to support EHR implementation is a barrier to EHR implementation.                                 | Resources available (for implementation)                  |
| 12) Lack of technical support is a barrier to EHR implementation.                                                                                        | Human resources (IT support)                              |
| 13) Effective management of the transition period to EHRs (for example, fair distribution of tasks among staff) is a facilitator to EHR implementation.. | Management (strategic plan to implement EHR)              |
| 14) Participation of healthcare professionals in the EHR implementation process is a facilitator to EHR implementation.                                  | Participation of end-users in the implementation strategy |
